# Supplementary material for: A mantle source formed after the lunar magma ocean crystallisation for the 3000 Ma-old lunar basalts
Source: Research Square preprint supplement (doi:10.21203/rs.3.rs-6530311/v1), 2025-06-17
Supplement: Supplementary file 1 [file 145261d7a4d4e60d7b2b2e87.docx]

**Supplementary Material**

***List of supplementary tables:***

Supplementary data 1:

- Table A1: Major and trace element contents of NWA 14178. Also provided, the data from the standards BHVO-2 and BCR-2.
- Table A2: SIMS Pb-Pb datasets for NWA 14178, NEA 003, LAP 02205, LAP 02224 and NWA 4734.
- Table A3: summary of age and initial Pb ratios for the five investigated samples.

Supplementary data 2: Results of Monte Carlo simulations for the investigated samples NWA 14178, NEA 003, LAP 02205, LAP 02224 and NWA 4734.

***Supplementary figures:***

Figure A1: Photographs of the investigated fragment of NWA14178. (a): picture of the hand specimen (picture from Luc Labenne, Labenne Meteorites) showing the large basaltic clast and the breccia containing basaltic clasts. (b) Back-Scatter Electron image (BSE) of a 3mm x1.5 mm section of the main basaltic clast showing the main mineral phases present in this rock. Plag: plagioclase, Px: pyroxene, K-feld: potassium feldspar, Phos: phosphate, Ol: olivine, Sulph: sulphide, Si-phase: silica, Mask: maskelynite. (c) BSE image showing the texture of the breccia, impact melt and glass beads.

Figure A2: (a): BSE image of sample NE 003 showing the investigated basaltic clast “clast 1”. (b) close-up of (a) showing the details of mineralogy of “clast 1”. The main mineral phases are labelled. (c): BSE image of sample LAP 02224 showing the texture and mineralogy of this sample. The main mineral phases are labelled. (d): BSE image of LAP 02205. The main mineral phases are labelled. Mg-Ol: Mg-rich olivine; Px: pyroxene; Fe-Ti Ox: Fe-Ti oxides; Plag: plagioclase; Fa: fayalite. Si-phase: Si-rich silicate.

Figure A3: (a) Co vs Ni plot showing the composition of these elements in NWA14178 relative to those of other low-Ti, high-Ti, KREEP and low-µ (YAM) basalts. (b) V vs Cr plot showing the composition of the same samples. (c) Zr vs Th and (d) Nb vs Th plots showing the composition of NWA14178 together with the composition of other low-Ti and high-Ti basalts. Data for NWA14178 from this work. Data from compilation of C. Neal (2001) for the Apollo collection and Anand et al. (2003, 2006); Borg et al. (2009, 2019); Curran et al. (2019); Day et al. (2006); Elardo et al. (2014); Fagan et al. (2003); Hallis et al. (2014); Haloda et al. (2009); Joy et al. (2006, 2008); Liu et al. (2009); Zeigler et al. (2005) for both Apollo and meteorite samples.

Figure A4: REE patterns of the different chemical groups of lunar basalts. Same references as in figure A3.

Fig A5: Top panel: 207Pb/206Pb vs 204Pb/206Pb plot of initial Pb isotopic composition determined in the investigated samples. Middle and bottom panels: weighted averages of 204Pb/206Pb and 207Pb/206Pb ratios.

Fig A6: 238UO/208Pb vs 207Pb/206Pb plot showing the data from LAP 02224. Blue: K-feldspars, Black: sulphides.

Fig A7: Top panel: 238UO/208Pb vs 207Pb/206Pb plot for data obtained in K-feldspars in LAP 02224. Three data out of four analyses form a regression which intercepts the X-axis. The analysis names of each investigated K-feldspar are indicated on the plot. Middle panel: regression formed by the two sulphides. Bottom panel: 238UO/208Pb vs 207Pb/206Pb plot in which regressions made by K-feldspar analyses and sulphide analyses are overlaid. Note the same value for the X-axis intercept.

Fig A8: Post-SIMS SEM (BSE and EDS) images of the four K-feldspar minerals analysed in LAP 02224. The analysis numbers correspond to the data shown in the top panel of the previous figure. Imaging was done using a Hitachi TM1000 SEM instrument housed at the Swedish Museum of Natural History. Working distance was set at 10 mm and acceleration voltage, at 20 kV.

Fig. A9: Evolution of the calculated age of basaltic source formation (tBS) as a function of the guessed age of the basaltic source formation (t_initial_guess) which is an entry parameter. The modelling shows that the modelled tBS converges quickly towards a single value irrespective of the t_initial_guess value. Results of the Monte Carlo simulations are shown for each investigated sample and for average age and initial Pb isotope ratios for the NWA 4734 clan.

***Analytical methods:***

*Major and trace element contents*

Rock chips were cut off the main fragment using a diamond wire saw. Between 0.03 and 0.11g of bulk rock were dissolved. The lunar meteorite samples were washed twice with distilled ultra-pure water involving two cycles of 30 seconds of ultrasonic bath and subsequent liquid removal.

Aliquots of USGS BHVO-2 and BCR-2 standards were processed and analyzed together with a fragment of NWA14178 to verify the accuracy of concentrations.

The samples and BHVO-2 fractions were placed in 3 ml Savillex beakers with 1ml of acid solution made of 3.5 ml 7M HNO3 and 10 ml concentrated HF (48%). The beakers were placed on hot plate at 135°C overnight. The beakers were placed in ultrasonic bath 5 mins twice then open to check the efficiency of dissolution. The samples were discolored and partly broken apart indicating that dissolution has begun. The beakers were placed on hot plate at 100°C to evaporate the HNO3+HF solution until almost dryness. After this step, 1ml of solution made of 3.5 ml 7M HNO3 + 10 ml concentrated HF was added to the samples. The beakers were inserted into Parr bombs and placed in oven at 150°C overnight then at 210°C for 24h. Afterward, the beakers were removed from Parr bombs and open to check whether dissolution was effective. At this stage, the samples looked like powder indicating that the dissolution was effective. The liquid was removed and put in 15 ml Savillex beakers. 1 ml of 7M HNO3 + 10 ml concentrated HF solution was added into the 3 ml Savillex beakers which were placed again in Parr bombs at 150°C overnight then at 210°C for 24h. The 3 ml Savillex beakers were taken out of the oven and removed from the Parr bomb. The liquid and residue were transferred into the 15ml Savillex beakers. The 3 ml Savillex beakers were rinsed twice with 1ml 7M HNO3 and each time, the liquid was transferred into the 15ml Savillex beakers. Afterward, the 15 ml Savillex beakers were put twice into ultrasonic bath 5mins. The 15ml Savillex were put on hot plate at 105°C to evaporate the liquid. When the solution was close to dryness, 3ml of 6M HCl were added. The beakers were closed and let on hot plate at 125°C overnight. After this step, the beakers were removed from the hot plate, then went into two cycles of ultrasonic bath of 5 mins each. 3ml of 7M HNO3 were added to the solution. The beakers were put on hot plate again at 115°C then the temperature was progressively increased to 125°C for 4h with sessions of 5 mins of ultrasonic bath every 30 mins. After this step, the beakers were opened to check whether the dissolution was completed. As the dissolution was indeed completed, the beakers were left on hot plate at 125°C overnight. The following day, the beakers were opened and the acid solution was evaporated to dryness at 105°C on hot plate. 1ml 7M HNO3 was addedto the residue then the beakers were left on hot plate at 100°C overnight.

Major and trace element concentrations were determined using a ThermoFisher quadrupole ICP-MS iCAPTM at the Centre for Star and Planet Formation (StarPlan) of the National Museum of Natural History, Copenhagen (Denmark). Samples were introduced into the plasma in a mixture of 0.4M HNO3 + 0.01M HF to ensure that all elements remained in solution during analysis. To minimize potential interferences, all element concentrations were determined in KED mode. The elemental concentrations of NWA14178 are presented in Table A1 together with data from BHVO and BCR standards.

*SEM imaging and SIMS measurements*

Prior to SIMS analyses, the samples were mapped using SEM imaging. The samples were mounted in epoxy resin, polished to flatness, cleaned with analytical grade ethanol and coated with carbon. They were mapped using Back-Scattered Electron (BSE) imaging and Energy Dispersive X-ray Spectroscopy (EDS) using a Thermo-Fisher Quanta FEG650 Scanning Electron Microscope (SEM) fitted with an Oxford Instruments INCA EDS detector and housed at the Swedish Museum of Natural History (Stockholm). The SEM was operated with a 20kV acceleration voltage and a working distance of 10 mm. Following SEM imaging, the carbon coating was removed and the sample mounts were cleaned with deionised water followed by analytical grade ethanol, dried down and finally coated with a 30 nm layer of gold.

The Pb-Pb measurements were made using a CAMECA IMS 1280 at the NordSIMS facility of the Swedish Museum of Natural History. Both sstandards and targets were analysed with a -13 kV 16O2− primary beam (10kV secondary beam) generated using a high-brightness Oregon Physics H201 RF Plasma source operating in critically-focused (Gaussian) tuning mode. Following pre-sputtering over an area larger than the field of view to remove gold and further minimize surface contamination, a small raster was retained for the analysis in order to homogenise the Gaussian beam profile. High transmission secondary beam optics (field magnification = 160x), and energy window of 45eV, a mass resolving power (MRP) of 4830 M/ΔM and simultaneous detection of Pb isotopes in four low-noise (<0.003 cps) ion counting electron multipliers (Hamamatsu R4146) were common to all analyses. Other analytical parameters varied between the five analytical sessions reported herein, as documented in the table below.

As lunar samples contain low amounts of Pb, detector backgrounds and gain drift can lead to significant bias on the measured isotopic ratios. Therefore, background counts and detector gains were monitored on a very regular basis following analytical protocols modified from Merle et al. (2020) and newly developed for this study.

Detector gains were determined using the BCR-2G basaltic glass standard (US Geological Survey). The measured values of BCR-2G were compared with the accepted values of this standard (Woodhead and Hergt, 2000) and a correction factor accounting for mass fractionation bias and inter-detector relative gain calibration (see Standard data file in supplementary material) was calculated. Such a correction factor was calculated for each analytical session and applied to the unknowns analysed during the same session. The average values of BCR-2G individual measurements during each analytical session as well as the calculated correction factors are provided in supplementary material.

For backgrounds, three different methods were utilized across the five analytical sessions, as indicated in the table. For the 2019 and 2020 sessions, the procedure involves a dedicated background analysis which was interspersed between each unknown analysis, with the primary beam blanked using motorized beam apertures and a +200 eV energy offset applied to further suppress any ion signal that might be present. For the peak hopping sessions in 2022 and 2024, the detector background was measured at an intermediate mass station (+0.25 Da) each cycle, accompanied by a +100 eV energy offset on the secondary beam. For the other sessions, a newly devised method was used in which 2 second on-peak integration was incorporated at every cycle (n = 60 to 80) during the analysis (both standards and unknowns) between the 20 second signal measurements. For the background measurement, the secondary ion beam was blanked using extreme values on deflectors located both before and after the electrostatic analyser (DTFA2 and DC1 respectively) thus allowing the magnetic field to remain locked under high-precision NMR regulation. The integrated means from each analysis were incorporated into a running mean over five analyses, with the centre value applied to the analysis. Two standards were analysed at the beginning and the end of each analytical session and after every five unknown measurements.

| **Session date** | **Dec 2019** | **Jan 2020** | **May 2020** | **Mar**  **2022 -1** | **Mar 2022-2** | **May 2022** | **Nov 2023** | **May 2024** | **Sept 2024** |
| --- | --- | --- | --- | --- | --- | --- | --- | --- | --- |
| **Sample** | LAP 02224 | LAP 02224  LAP 02205 | NEA 003 | NWA 14178 | NWA 14178 | NWA 14178 | NEA 003 | NWA 4734 | LAP 02205  LAP 02224 |
| **Phases analysed** | K-fsp, phos, sulf | K-fsp, K+Si-rich , phos, sulf | K-fsp, phos, sulf | plag | K-fsp, Si-rich, phos, sulf | K-fsp, phos | K-fsp, phos, sulf | K-fsp, phos, sulf, badd | K-fsp, phos, sulf |
| **Primary (nA) (targets/stds)** | 10/10 | 10/10 | 10/10 | 40/40 | 2/20 | 2/2 | 3/10 | 3/20 | 3/10 |
| **Pre-sputter (nA) sample** | 10 | 10 | 10 | 40 | 2 | 2 | 3 | 10 | 40 |
| **Presputter time (s)** | 120 | 120 | 120 | 60 | 50 | 80 | 90 | 90 | 60 |
| **Presputter raster (µm)** | 25 | 25 | 25 | 30 | 15 | 20 | 20 | 20 | 20 |
| **Analysis raster (µm)** | 0 | 0 | 0 | 20 | 5 | 5 | 5 | 5 | 5 |
| **Field of view**  **(targets/stds μm)** | 25/25 | 20/20 | 20/20 | 32/32 | 10/10 | 10/10 | 10/10 | 8/8 | 18/18 |
| **DTOS gate %** | 0 | 0 | 0 | 100 | 100 | 0 | 0 | 0 | 0 |
| **Species (ct. time, sec)** | Pb multi (20) | Pb multi (20) | Pb multi (20) | Pb multi (30), bgd (2) | Pb multi (20) | Pb multi (20) | Pb multi  (20) | Pb multi  (20) | Pb multi (30), UO(2), bgd (2) |
| **Field control** | NMR reg. | NMR reg. | NMR reg. | peak jumping | NMR reg. | NMR reg. | NMR reg. | NMR reg. | peak jumping |
| **n cycles**  **(targets/stds)** | 80/40 | 80/40 | 80/40 | 40/40 | 72/24 | 80/40 | 60/40 | 40/40 | 40/20  50/20 |
| **Background**  **protocol** | separate run, Ip blank method, 20 cycles | separate run, Ip blank method, 20 cycles | separate run, Ip blank method, 20 cycles | in-run per cycle, HV offset | in-run per cycle, sec. beam blanked | in-run per cycle, sec. beam blanked | in-run per cycle, sec. beam blanked | in-run per cycle, sec. beam blanked | in-run per cycle, HV offset |

*Pb-Pb Data processing*

The Pb isotope ratios were calculated using an in-house Excel Add-In, based on either an integrated mean ratios procedure based on total counts or on an approach based on mean ratios based on counts for each scan (Merle et al. 2020). The use of either approach is dependant of number of counts on 206Pb and 204Pb and is detailed in Merle et al. (2020).

The data processing and filtering procedure applied to the data acquired for this study are similar to those expressed in Snape et al., 2016 and Merle et al. (2020, 2024).

**Supporting information**

**Sample description**

*NWA 14178*

The investigated sample is a breccia containing an approximately 13mm x 7mm large clast of basalt (hereafter “main basaltic clast”). The breccia is formed by a dark matrix containing numerous mineral fragments and mm-sized clasts of the same nature as the main basaltic clast (Fig. A1a). The main basaltic clast has a medium to coarse-grained sub-ophitic texture with elongated plagioclase laths forming an almost interconnected framework (Figs. A1a and 1b). The plagioclases have an average length of 0.6mm and representing approximately 30% of the volume of the basalt (Fig. A1b). Plagioclase is locally converted to maskelynite as evidenced by its smooth aspect with absence of fracture (Fig. A1b). Approximately 60% of the sample volume is formed by large (≤ 2mm) Ca-pyroxene crystals and the remining 10% of the volume is made up by acicular Fe-Ti oxides, olivine and silica (Fig. A1b). Potassium feldspar, phosphate and sulphide also occur as accessory minerals (Fig. A1b).

Heterogeneous, locally vesicular impact melt is present in the breccia (Fig. A1c). In the matrix of the breccia, three glass beads of 60µm to 120µm in diameter were identified. Two of them present a regular spherical shape whereas the third bead presents an irregular aspect with numerous inclusions on the edge (Fig. A1c).

*NEA 003 basaltic clast*

The fragment of NEA003 investigated here is a polycrystalline breccia containing two large clasts, of basaltic and gabbroic petrography (Fig. A2). The gabbroic clast present in our sample (clast 2, Fig. A2a) presents mineralogical and textural features similar to those of the clast documented by Haloda et al. (2009). In this study, we have investigated the 2.5 x 5mm coarse-grained basaltic clast (clast 1 in fig. A2a). It consists mainly of large (up to 1mm size) zoned olivine with Mg-rich cores and increasing Fe content towards the rims, pyroxene, interstitial plagioclase laths, minor amounts of Fe-Olivine and rare Fe-Ti oxides (Fig. A2b). As in the clast investigated by Haloda et al., (2009), some Mg-rich olivines in the clast investigated here, are surrounded by pyroxene (Fig. A2b). Compared to the gabbroic clast documented by Haloda et al. (2009), the basaltic clast investigated here is characterised by a higher proportion of fayalite (5% volume against traces in the gabbro) and more elongated plagioclases. Nevertheless, these features are also present in the sample documented by Haloda (2009) but in much smaller proportions and have been described as late-stage mineral assemblage (Haloda et al., 2009). As a general feature, the NEA 003 clast investigated here has a coarser texture with a higher proportion of olivine (Fig. A2).

*LAP 02224 and LAP 02205*

Both investigated samples present the same texture and have mineral proportions that are similar to their earlier descriptions of the same meteorites by Anand et al. (2006). Briefly, the investigated samples contain approximately 0.5 mm-size clinopyroxene and plagioclase partly transformed into maskelynite representing 40% and 30% of the volume respectively and 10% of Fe-Ti oxides (Fig. A2). The remaining 10% is formed by a Si-rich and K-poor phase, Mg-rich olivine and sulphides. Both samples contain symplectites of fayalite associated with phosphates and K-rich felspar, commonly as small inclusions in fayalite and rare Fe-rich clinopyroxene (Fig. A2).

*NWA 4734*

The texture and mineralogy of meteorite NWA 4734 has been documented by several previous studies (Connolly et al., 2008; Fernandes et al., 2009; Wang et al., 2012; Elardo et al., 2014; Merle et al., 2020). It has a coarse-grained texture formed by pyroxenes (50% volume), plagioclase (30% volume). Silicate-rich phases, silica-feldspar intergrowths, fayalite, ilmenite and accessory minerals (phosphates, zirconolites and baddeleyites) form the remaining 20%. The fragment investigated in the present study is the same as in Merle et al. (2020) which has been re-polished to remove the SIMS spots.

*Major and trace element contents of NWA 14178*

The major and trace element contents of NWA 14178 are provided in Table A1 in the supplementary material. The TiO2 content of NWA 14178 is 3.78 wt%, its Al2O3 content is 7.37 wt% and its K2O content, 1007 ppm (Table A1). According to the classification established by Neal and Taylor, 1992), NWA 14178 is a low-Ti, low-Al and low-K basalt. In NWA 14178, measured contents of CaO (9.92 wt%), Na2O (0.30 wt%) and TiO2 are rather similar to those previously determined in NWA 4734 (Elardo et al., 2014). MgO (5.55 wt%) and FeO content (27 wt%) are respectively lower and higher than those measured in NWA 4734, the LAP samples. Compatible trace element contents (Ni = 32.8 ppm, Co = 41.3 ppm, Cr = 3201 ppm, V = 141 ppm) are indistinguishable from the NWA 4734 and LAP basalts (Figs. A3a and A3b). NWA 14178 data point plots close to the compositional field of these basalts in the Ni vs Co and V vs Cr diagrams (Figs. A3a and A3b).

The high-field strength element (HFSE) contents (Nb = 14.50 ppm, Zr = 225.40 ppm and Th = 2.40 ppm) of NWA 14178 are within the range of the values of the NWA 4734 and LAP meteorites. NWA 14178 like NWA 4734 and the LAP meteorites have higher Th, Nb and Zr contents higher than most of the other low-Ti basalts, plotting away from the latter in the Th vs Nb and Th vs Zr diagrams (Figs. A3c and A3d).

When compared to the other low-Ti lunar basalts, the REE patterns of the sample NWA 14178 is similar to those of the samples NWA 4734 and LAP (Fig. A4). As with these samples, NWA 14178 is slightly enriched in Light REE (LEE) compared to the Middle REE (MREE) with a LaCn/SmCn = 1.15 that is within the range of the ratios observed in the 3000 Ma meteorites (LaCn/SmCn = 1.08-1.15). NWA 14178 is also enriched in MREE compared the Heavy REE (HREE) with a DyCn/YbCn = 1.30 that is marginally higher than the range of the NWA 4734, LAP 02205 and LAP 02224 meteorites (DyCn/YbCn = 1.16-1.20). In NWA 14178, the overall enrichment of LREE compared to the HREE is not strong with a LaCn/YbCn = 1.54 that is slightly higher than the range in the meteorites NWA 4734, LAP 02005, and LAP 02224 (LaCn/YbCn = 1.11-1.46) but significantly lower than the LaCn/YbCn ratio of 2.4 in KREEP basalts (Borg et al., 2019; Hallis et al., 2014). NWA 14178 displays a strong negative Eu anomaly Eu/Eu* (Eu/Eu* = Eucn/[Smcn x Gdcn]0.5) of 0.45 ± 0.04 that is close to those calculated for NWA 4734 (Eu/Eu* = 0.43 ± 0.05) and the LAP meteorites (Eu/Eu* = 0.45 ± 0.13). These negative anomalies are among the lowest calculated for Low-Ti basalts. Only two samples, VLT basaltic rock MIL 13317 and KREEP basalt 15386, display stronger Europium anomalies (Eu/Eu* = 0.21). Despite some similarities in terms of REE patterns and element ratios (LaCn/SmCn = 1.10-1.17; LaCn/YbCn = 1.39-1.44), NWA 032 and NWA 049 display weaker Eu anomalies (Eu/Eu* = 0.50). The Ti/Sm ratio of NWA 14178 (Ti/Sm = 4987) is rather similar to those in NWA 4734 and the LAP meteorites (Ti/Sm = 4098-4987). The range of this ratio is significantly higher than those determined in KREEP basalts (Ti/Sm = 617; Borg et al., 2019; Hallis et al., 2014) that has been interpreted as an evidence of the lack of involvement of a KREEP component in the chemical characteristics of NWA 4734 and the LAP samples (Elardo et al., 2014).

Fractional crystallisation modelling of NEA 003

The coarser texture and the presence of Mg-rich olivine of mm-size suggest that NEA 003 could have been formed partly by accumulation of olivine and possible pyroxene (fig A1). The texture of NWA 4734, the LAP samples or NWA 14178 with elongated plagioclase and Fe-Ti oxides (fig A1 and Fig 1) may indicate that these rocks were formed by the fast crystallisation of a liquid. Based on these observations, we postulate that the NWA 4734 has the composition of the remaining liquid (CL) after crystallisation from a parental melt that formed a cumulate (CR) with a composition close to NEA 003. The parental melt has an unknown composition C0. The composition of NWA 4734 is CL and those of NEA 003, CR.We modelled the composition of CL using CR as an entry parameter.

The composition of CL is given by the following equation:

With:

: distribution coefficient of a chemical element in a given mineral.

Proportion of this mineral that crystallised.

.

The composition of CR is given by the equation below:

By combining these two equations, we can eliminate the unknown parameter C0 and CL can be calculated using CR as entry parameter:

We assumed the crystallisation of a cumulate with the following mineral proportions:

Olivine: 55%; clinopyroxene: 20%, plagioclase: 20% and potassium feldspar: 5%. These proportions are close to those estimated into NEA 003. The distribution coefficient used in the modelling are given in the table below:

| **Kdi** | **La** | **Ce** | **Nd** | **Sm** | **Eu** | **Tb** | **Yb** | **Kd reference** |
| --- | --- | --- | --- | --- | --- | --- | --- | --- |
| Dol | 0.0004 | 0.0005 | 0.001 | 0.0013 | 0.0016 | 0.0015 | 0.0015 | McKenzie and O'nion, 1991 (Moon) |
| Dcpx | 0.056 | 0.092 | 0.23 | 0.445 | 0.474 | 0.57 | 0.542 | Rollinson, 1993 |
| Dplag | 0.27 | 0.2 | 0.14 | 0.11 | 1.1 | 0.06 | 0.031 | McKenzie and O'nion, 1991 (Moon) |
| Dfeld-K | 0.08 | 0.037 | 0.035 | 0.025 | 4.45 | 0.025 | 0.03 | Rollinson, 1993 |

A satisfying match between the calculated CL values and the composition of NWA 4734 (See fig. below) when 20% of residual liquid remains.


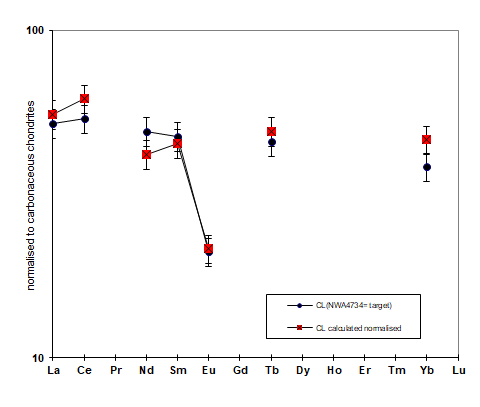


Modelling the Pb isotope characteristics of the mantle source (s) of NWA 4734 clan

Two-stage model:

We tried to match the Pb isotope composition of the NWA4734 clan using such a two-stage time-related evolution model. This model is based on Monte Carlo simulations to produce results that are independent of the age of formation of the Moon and age of differentiation of the mantle sources of the basalts (Merle et al., 2024). Using this model, we attempted to estimate the µ value of the mantle source of the NWA4734 clan to construct the time-related evolution of the Pb isotopes of this source. The first stage involves evolution of Pb isotope ratios from an initial composition at the time of Moon formation in a reservoir assumed to be LMO with an unknown  (µLMO) until the time of basalt source formation. The second stage involves the evolution of Pb isotope ratios in the basalt source with a specific µ (BS) until the time of basalt formation (Merle et al., 2024). Primordial Solar Pb isotope composition represented by Canyon Diablo troilite (Tatsumoto et al., 1973) is taken as the starting composition for the model. This Pb isotopic composition starts to evolve at the time of Moon formation and, by default, LMO formation at *tLMO*. At that time, the LMO is assumed to have a given -value hereafter referred as *LMO*. At the time of formation of the basalt source from the LMO, *tBS*, Pb continues to evolve in this source with the -value of *BS* until basalt formation at *tbasalt.* At this time the Pb isotope composition will be equal to the estimated initial compositions for the analysed basalts. Neither of the four parameters LMO, BS, *tLMO* or *tBS* are known. The relevant equations were implemented in MATLAB, setting limits for *tLMO* at 4580 Ga, and *tBS* at 4330 Ga, slightly younger than estimated KREEP formation time (Borg et al. 2019) and one million pairs of *tLMO* or *tBS* were randomly generated assuming a uniform distribution of both ages. The target of the modelling is to calculate tBS and µBS. This two-stage model involving a mantle source derived from an undifferentiated LMO failed to yield any results then is not suitable to explain the Pb isotope signature of the NWA 4734 clan.

Three-stages models:

As two-stage model failed, we developed three-stage evolution models. Such type of model involves evolution of the isotopic ratios of the undifferentiated LMO (evolution stage 1) from time of formation of the Moon until formation of a primary mantle source (or PS) at tPS. This source evolves through time (evolution stage 2) until extraction of the basalt source at tBS. The isotope composition of this basalt source evolves until the melting event that created the basalts (evolution stage 3). This model is difficult to implement. In addition to the four unknown parameters from the two-stage model, there are four other unknown parameters: age of extraction of the basalt source (tBS),µBS of the basalt source and (207Pb/206Pb)PS and (204Pb/206Pb)PS ratios in the mantle source at the time of the basalt source extraction that cannot be solved with only two equations. Despite many of these parameters cannot be entirely constrained, a three-stage model can be conceptualized without making critical and unconstrained, assumptions. We have designed two different models.

Model A:

This model is derived from the two-stage model of Snape et al. (2019). This model also assumed that the Moon formed at 4500 Ma and LMO has a µLMO value of 460 (Snape et al., 2016). We assumed that the primary source with an unknown μPS formed at approximately 4370-4330 Ma (tPS) from the LMO. At a given time tBS, this source is affected by a differentiation event that creates the basalt source. The target of the modelling is to calculate tBS and µBS. To implement this modelling, we make similar assumptions as in Snape et al. (2019): the age of the Moon’s formation is 4500 Ma, the LMO has a μLMO of 460 and as all the mantle sources of the basalts, primary source was extracted from LMO at 4350 Ma. Using these assumptions, we can calculate the composition of the LMO at the time of formation of the primary source (evolution stage 1). The evolution stage 2 and stage 3 are derived from our two-stage model (see MATLAB code below). This model yielded source formation age and µ values with uncertainties too large to be meaningful.

Model B:

This model involves derivation of the basaltic source from a low-μ mantle source similar to those of the low-μ basalts. Evolution stage 1 corresponds to LMO evolution from formation of the Moon until derivation of the low-μ source. The second evolution stage corresponds to the evolution of the low-μ source from its formation. This stage is modelled by our Matlab code used to determine the μ value of low-μ basalt source (Merle et al., 2024). From the formation of basalt source at tBS untilformation of 3000 Ma-old basalts, the evolution of the isotope composition of source corresponds to the third stage. In this model, time of basalt source formation (t_initial_guess in the code)is initially set as an entry parameter and varies between 3000 Ma and 4580 Ma. Monte Carlo simulations (200000 tries) calculate μBS and tBS for each value of t_initial_guess (set at 100 tries then implementing a step of 16 Ma for each Monte Carlo simulation). The results converge towards a single value and do not change when t_initial_guess is higher than 3200 to 3500, depending on the sample (Fig. A9).

Matlab code:

% Main file for the "3Ga meteorites from lowµ source" code

clc, clear commandwindow

clc, clear workspace

data = readmatrix('Pb_for_mu_data-2.csv');

%file containing sample N, Age, 1s abs err, 204/206 init,1s abs err, 207/206 init, 1s abs err

for j=1:7 %change to be similar to the number of lines in Pb_for_mu_data.csv

% Parameters (these should be defined with your specific values and uncertainties)

Pb204_206_low_mu = 0.0403; % (204Pb/206Pb)_low mu

Pb207_206_low_mu = 1.3173; % (207Pb/206Pb)_low mu

Pb204_206_3Ga = data(j,4); % (204Pb/206Pb)_3Ga

Pb207_206_3Ga = data(j,6); % (207Pb/206Pb)_3Ga

mu_low_mu = 92; % μ_low mu

lambda_238 = 1.55125e-10*1e6; % Decay constant for 238U

lambda_235 = 9.8485e-10*1e6; % Decay constant for 235U

t_low_mu = 3865; % Reference time for low mu

t_3Ga = data (j,2); % reference time for 3 Ga

% Uncertainties

Pb204_206_low_mu_err = 0.0007;

Pb207_206_low_mu_err = 0.0049;

Pb204_206_3Ga_err = data(j,5);

Pb207_206_3Ga_err = data(j,7);

mu_low_mu_err = 9;

t_low_mu_err = 2;

t_3Ga_err = data(j,3);

% Monte Carlo parameters

num_simulations = 200000; % Number of simulations

t_solutions = zeros(num_simulations, 1);

mu_solutions = zeros(num_simulations, 1);

% Initial guess for t (you might need to adjust this based on your problem)

% Define the range and interval

start_value = 3000;

end_value = 4580;

num_points = 100; % Define how many points you want between start and end

% Generate the sequence of numbers using linspace

t_initial_guesses = linspace(start_value, end_value, num_points);

% Initialize result storage if needed

results = zeros(num_points, 1); % Adjust the size and dimension as needed

% Loop over the generated values and inject into calculation

for k = 1:num_points

t_initial_guess = t_initial_guesses(k);

% Solve for t using Monte Carlo simulation

options = optimset('Display', 'off'); % Option to turn off display

for i = 1:num_simulations

% Generate random samples based on uncertainties (assuming normal distribution)

Pb204_206_low_mu_sample = normrnd(Pb204_206_low_mu, Pb204_206_low_mu_err);

Pb207_206_low_mu_sample = normrnd(Pb207_206_low_mu, Pb207_206_low_mu_err);

Pb204_206_3Ga_sample = normrnd(Pb204_206_3Ga, Pb204_206_3Ga_err);

Pb207_206_3Ga_sample = normrnd(Pb207_206_3Ga, Pb207_206_3Ga_err);

mu_low_mu_sample = normrnd(mu_low_mu, mu_low_mu_err);

t_low_mu_sample = normrnd(t_low_mu, t_low_mu_err);

t_3Ga_sample = normrnd(t_3Ga, t_3Ga_err);

% Define the equation as an anonymous function with sampled parameters

f = @(t) ...

((1 / Pb204_206_low_mu_sample - mu_low_mu_sample * (exp(lambda_238 * t) - exp(lambda_238 * t_low_mu_sample)) - 1 / Pb204_206_3Ga_sample) / (exp(lambda_238 * t) - exp(lambda_238 * t_3Ga_sample))) - ...

((Pb207_206_low_mu_sample/ Pb204_206_low_mu_sample - mu_low_mu_sample * (exp(lambda_235 * t) - exp(lambda_235 * t_low_mu_sample)) / 137.88 - Pb207_206_3Ga_sample/ Pb204_206_3Ga_sample) / (exp(lambda_235 * t) - exp(lambda_235 * t_3Ga_sample)) * 137.88);

% Solve for t using fsolve

t_solutions(i) = fsolve(f, t_initial_guess, options);

mu_solutions(i)=(-1)*((1 / Pb204_206_low_mu_sample - mu_low_mu_sample * (exp(lambda_238 * t_solutions(i) ) - exp(lambda_238 * t_low_mu_sample)) - 1 / Pb204_206_3Ga_sample) / (exp(lambda_238 * t_solutions(i) ) - exp(lambda_238 * t_3Ga_sample)));

end

% Calculate mean and standard deviation of the solutions

t_mean = mean(t_solutions);

t_std = std(t_solutions);

mu_mean = mean(mu_solutions);

mu_std = std(mu_solutions);

%storage of results in Res matrix

Res(k,1) = data(j,1);

Res(k,2) = t_mean;

Res(k,3) = 2*t_std;

Res(k,4) = mu_mean;

Res(k,5) = 2*mu_std;

Res(k,6) = t_initial_guess;

% Display the results

%disp(['sample name:', num2str(data(j,1))]);

%disp(['The mean solution for t is: ', num2str(t_mean), ' million years']);

%disp(['The standard deviation of t is: ', num2str(t_std), ' million years']);

%disp(['The mean solution for mu is: ', num2str(mu_mean)]);

%disp(['The standard deviation of mu is: ', num2str(mu_std)]);

%disp (['t guess is:',num2str(t_initial_guess)]);

end

%store Res matrix in matrix Fin

Fin{j} = Res;

%write results in an excel spreadsheet

%writematrix(Fin{j},'results_3stages_model.xlsx','sheet',j);

%plot results

figure;scatter(Fin{1,j}(:,6),Fin{1,j}(:,2),' blue','filled','square')

title(Res(k,1),'FontSize',14, 'Fontweight','bold', 'color', 'black');

hold on;

errorbar(Fin{1,j}(:,6),Fin{1,j}(:,2),Fin{1,j}(:,3), 'LineStyle' , 'none' , 'color' ,'r');

hold on;

plot(Fin{1,j}(:,6),Fin{1,j}(:,2), '-', 'LineWidth', 0.5, 'Color', 'black');

xlabel('t initial guess');

ylabel('tBS');

xlim([2600 4600]);

ylim([2600 4600]);

hold off;

end

References:

Anand, M., Taylor, L. A., Floss, C., Neal, C. R., Terada, K., & Tanikawa, S. (2006). Petrology and geochemistry of LaPaz Icefield 02205: A new unique low-Ti mare-basalt meteorite. *Geochimica et Cosmochimica Acta*, *70*(1), 246–264.

Anand, M., Taylor, L. A., Misra, K. C., Demidova, S. I., & Nazarov, M. A. (2003). KREEPy lunar meteorite Dhofar 287A: A new lunar mare basalt. *Meteoritics and Planetary Science*, *38*(4), 485–499.

Borg, L. E., Gaffney, A. M., Kruijer, T. S., Marks, N. A., Sio, C. K., & Wimpenny, J. (2019). Isotopic evidence for a young lunar magma ocean. *Earth and Planetary Science Letters*, *523*, 115706.

Borg, L. E., Gaffney, A. M., Shearer, C. K., DePaolo, D. J., Hutcheon, I. D., Owens, T. L., Ramon, E., & Brennecka, G. (2009). Mechanisms for incompatible-element enrichment on the Moon deduced from the lunar basaltic meteorite Northwest Africa 032. *Geochimica et Cosmochimica Acta*, *73*(13), 3963–3980.

Connolly H. C., Smith C., Benedix G., Folco L., Righter K., Zipfel J., Yamaguchi A., Aoudjehane H.C. 2008. The Meteoritical Bulletin, No. 93. *Meteoritics & Planetary Science* 43: 571–632.

Curran, N. M., Joy, K. H., Snape, J. F., Pernet-Fisher, J. F., Gilmour, J. D., Nemchin, A. A., Whitehouse, M. J., & Burgess, R. (2019). The early geological history of the Moon inferred from ancient lunar meteorite Miller Range 13317. *Meteoritics and Planetary Science*, *54*(7), 1401–1430.

Day, J. M. D., Taylor, L. A., Floss, C., Patchen, A. D., Schnare, D. W., & Pearson, D. G. (2006). Comparative petrology, geochemistry, and petrogenesis of evolved, low-Ti lunar mare basalt meteorites from the LaPaz Icefield, Antarctica. *Geochimica et Cosmochimica Acta*, *70*(6), 1581–1600. https://doi.org/https://doi.org/10.1016/j.gca.2005.11.015

Elardo, S. M., Shearer, C. K., Fagan, A. L., Borg, L. E., Gaffney, A. M., Burger, P. v., Neal, C. R., Fernandes, V. A., & McCubbin, F. M. (2014). The origin of young mare basalts inferred from lunar meteorites Northwest Africa 4734, 032, and LaPaz Icefield 02205. *Meteoritics & Planetary Science*, *49*(2), 261–291. https://doi.org/10.1111/maps.12239

Fagan, T. J., Taylor, G. J., Keil, K., Hicks, T. L., Killgore, M., Bunch, T. E., Wittke, J. H., Mittlefehldt, D. W., Clayton, R. N., Mayeda, T. K., Eugster, O., Lorenzetti, S., & Norman, M. D. (2003). Northwest Africa 773: Lunar origin and iron-enrichment trend. *Meteoritics & Planetary Science*, *38*(4), 529–554. https://doi.org/10.1111/j.1945-5100.2003.tb00025.x

Fernandes V. A., Korotev R. L., Renne P. R. 2009. 40Ar/39Ar ages and chemical composition for lunar mare basalts: NWA 4734 and NWA 4898. 40th Lunar and Planetary Science Conference, Abstract #1045.

Haloda, J., Týcová, P., Korotev, R. L., Fernandes, V. A., Burgess, R., Thöni, M., Jelenc, M., Jakeš, P., Gabzdyl, P., & Košler, J. (2009). Petrology, geochemistry, and age of low-Ti mare-basalt meteorite Northeast Africa 003-A: A possible member of the Apollo 15 mare basaltic suite. *Geochimica et Cosmochimica Acta*, *73*(11), 3450–3470. https://doi.org/10.1016/j.gca.2009.03.003

Joy, K. H., Crawford, I. A., Downes, H., Russell, S. S., & Kearsley, A. T. (2006). A petrological, mineralogical, and chemical analysis of the lunar mare basalt meteorite LaPaz Icefield 02205, 02224, and 02226. *Meteoritics & Planetary Science*, *41*(7), 1003–1025. https://doi.org/10.1111/j.1945-5100.2006.tb00500.x

Joy, K. H., Crawford, I. A., Anand, M., Greenwood, R. C., Franchi, I. A., & Russell, S. S. (2008). The petrology and geochemistry of Miller Range 05035: A new lunar gabbroic meteorite. *Geochimica et Cosmochimica Acta*, *72*(15), 3822–3844. https://doi.org/10.1016/j.gca.2008.04.032

Joy, K. H., Crawford, I. A., Downes, H., Russell, S. S., & Kearsley, A. T. (2006). A petrological, mineralogical, and chemical analysis of the lunar mare basalt meteorite LaPaz Icefield 02205, 02224, and 02226. *Meteoritics & Planetary Science*, *41*(7), 1003–1025. https://doi.org/10.1111/j.1945-5100.2006.tb00500.x

Liu, Y., Spicuzza, M. J., Craddock, P. R., Day, J. M. D., Valley, J. W., Dauphas, N., & Taylor, L. A. (2010). Oxygen and iron isotope constraints on near-surface fractionation effects and the composition of lunar mare basalt source regions. *Geochimica et Cosmochimica Acta*, *74*(21), 6249–6262.

McKenzie, D. A. N., & O’Nions, R. K. (1991). Partial Melt Distributions from Inversion of Rare Earth Element Concentrations. *Journal of Petrology*, *32*(5), 1021–1091.

Merle, R. E., Nemchin, A. A., Whitehouse, M. J., Snape, J. F., Kenny, G. G., Bellucci, J. J., Connelly, J. N., & Bizzarro, M. (2020). Pb-Pb ages and initial Pb isotopic composition of lunar meteorites: NWA 773 clan, NWA 4734, and Dhofar 287. *Meteoritics and Planetary Science*.

Merle, R. E., Nemchin, A. A., Whitehouse, M. J., Kenny, G. G., & Snape, J. F. (2024). Pb Isotope Signature of a Low-μ (238U/204Pb) Lunar Mantle Component. *Journal of Petrology*, *65*(6), egae062.

Rollinson H.R., 1993, Using Geochemical Data: Evaluation, Presentation, Interpretation, Longman, UK. 352 pp.

Snape, J. F., Nemchin, A. A., Bellucci, J. J., Whitehouse, M. J., Tartèse, R., Barnes, J. J., Anand, M., Crawford, I. A., & Joy, K. H. (2016). Lunar basalt chronology, mantle differentiation and implications for determining the age of the Moon. *Earth and Planetary Science Letters*, *451*, 149–158.

Wang Y., Hsu W., Guan Y., Li X., Li Q., Liu Y., Tang G. 2012. Petrogenesis of the Northwest Africa 4734 basaltic lunar meteorite. *Geochimica et Cosmochimica Acta* 92: 329–344.

Woodhead, J. D., Hergt, J. M., Davidson, J. P., & Eggins, S. M. (2001). Hafnium isotope evidence for “conservative” element mobility during subduction zone processes. *Earth and Planetary Science Letters*, *192*(3), 331–346.

Zeigler, R. A., Korotev, R. L., Jolliff, B. L., & Haskin, L. A. (2005). Petrography and geochemistry of the LaPaz Icefield basaltic lunar meteorite and source crater pairing with Northwest Africa 032. *Meteoritics & Planetary Science*, *40*(7), 1073–1101.
